# Supplementary material for: Development and Validation of a One-Step Reverse Transcription Real-Time PCR Assay for Simultaneous Detection and Identification of Tomato Mottle Mosaic Virus and Tomato Brown Rugose Fruit Virus
Source: MDPI journal article supplement (doi:10.3390/plants11040489), 2022-02-11
Supplement: s1 [file s1]

Supplementary Table S1. Isolates and material used in this study

| Virus                     | ID                    | Collection                                                     | Origin             | plant species/cv.               | sampling    | Matrix              |
|---------------------------|-----------------------|----------------------------------------------------------------|--------------------|---------------------------------|-------------|---------------------|
| BPeMV                     | BN-4708               | DSMZ                                                           | Netherlands        | <i>S. melongena</i>             | before 1988 | leaf <sup>***</sup> |
| CGMMV                     | PV-0375               | DSMZ                                                           | Germany            | <i>Cucumis sp.</i>              | Before 1992 | leaf                |
| CGMMV                     | NIB V271              | at NIB maintained since 2012 (origin: NVWA, isolate 4073020-A) | Netherlands        | <i>Cucumis sativus</i>          | nd          | leaf                |
| CGMMV                     | NIB V320              | at NIB maintained since 2018 (origin: Murcia. Miguel Aranda)   | Spain              | <i>Cucumis sativus</i>          | nd          | leaf                |
| Healthy                   | MR 5                  | CREADC                                                         | Italy              | <i>S.lycopersicum</i>           |             | leaf                |
| Healthy                   | SanoPep               | CREADC                                                         | Italy              | <i>C.annuum</i>                 |             | leaf                |
| Healthy                   | MR5-s                 | CREADC                                                         | Italy              | <i>S.lycopersicum</i>           |             | seeds               |
| Healthy                   | SanoPep-s             | CREADC                                                         | Italy              | <i>C.annuum</i>                 |             | seeds               |
| ObPV                      | PV-1176               | DSMZ                                                           | Hungary            | <i>C.annuum</i>                 | before 2015 | leaf <sup>***</sup> |
| ORSV                      | PV-1048               | DSMZ                                                           | Germany            | Orchis spp.                     | before 2007 | leaf <sup>***</sup> |
| PaMMV                     | PV-0606               | DSMZ                                                           | Greece             | <i>C.annuum</i>                 | before 2000 | leaf <sup>***</sup> |
| PMMoV                     | PV-0165               | DSMZ                                                           | nd                 | <i>C.annuum</i>                 | before 2019 | leaf <sup>***</sup> |
| RMV                       | PV-0145               | DSMZ                                                           | nd                 | <i>Plantago media</i>           | before 1988 | leaf <sup>***</sup> |
| SFBV                      | PV-1058               | DSMZ                                                           | nd                 | <i>Streptocarpus spp.</i>       | before 2012 | leaf <sup>***</sup> |
| SHMV                      | PV-0156               | DSMZ                                                           | nd                 | <i>Phaseolus vulgaris</i>       | before 1988 | leaf <sup>***</sup> |
| TMGMV                     | PV-0124*              | DSMZ                                                           | Italy              | nd                              | before 1988 | leaf <sup>***</sup> |
| TMV                       | NIB V037              | NIB                                                            | Slovenia           | <i>S.lycopersicum</i>           | 2000        | leaf                |
| TMV                       | PV-0137               | DSMZ                                                           | Germany            | nd                              | before 1988 | leaf <sup>***</sup> |
| TMV                       | PV-1252               | DSMZ                                                           | nd                 | <i>Nicotian tabacum</i>         | 2019        | leaf <sup>***</sup> |
| ToBRFV                    | MR50-Tob-SIC22/19-T   | CREADC                                                         | Italy              | <i>S.lycopersicum</i>           |             | leaf                |
| ToBRFV                    | MR50-Tob-SIC22/19-T-s | CREADC                                                         | Italy              | <i>S.lycopersicum</i>           |             | seeds               |
| ToBRFV                    | Tob-SIC22/19-P        | CREADC                                                         | Italy              | <i>C.annuum</i>                 |             | leaf                |
| ToBRFV                    | Tob-SIC25/19-T        | CREADC                                                         | Italy              | <i>S.lycopersicum</i>           |             | leaf                |
| ToBRFV                    | Tob-Pie105/19-T       | CREADC                                                         | Italy              | <i>S.lycopersicum</i>           |             | leaf                |
| ToBRFV                    | Tob-Pie105/19-P       | CREADC                                                         | Italy              | <i>C.annuum</i>                 |             | leaf                |
| ToBRFV                    | MR50 -10-5**          | CREADC                                                         | Italy              | <i>S.lycopersicum</i>           |             | leaf                |
| ToBRFV                    | S21                   | Volcani center                                                 | Israel             | <i>S.lycopersicum</i>           | nd          | leaf                |
| ToBRFV                    | S22                   | Volcani center                                                 | Israel             | <i>S.lycopersicum</i>           | nd          | leaf                |
| ToMMV                     | S1                    | IBMCP                                                          | Spain              | <i>Nicotiana benthamiana</i>    | 2019        | leaf                |
| ToMMV                     | S2                    | IBMCP                                                          | Spain              | <i>Nicotiana benthamiana</i>    | 2019        | leaf                |
| ToMMV                     | PV-1267*              | DSMZ                                                           | California (USA)   | <i>S.lycopersicum</i>           | 2016        | leaf <sup>***</sup> |
| ToBRFV/ToMMV <sup>§</sup> | Pep-271               | CREA-DC                                                        | Italy -Battipaglia | <i>C. annuum</i> /'Almuden'     | 2021        | leaf                |
| ToBRFV/ToMMV <sup>§</sup> | Pep-282               | CREA-DC                                                        | Italy- Fondi       | <i>C. annuum</i> /'Achille'     | 2021        | leaf                |
| ToBRFV/ToMMV <sup>§</sup> | Pep-284               | CREA-DC                                                        | Italy- Fondi       | <i>C. annuum</i> /'Luvonor'     | 2021        | leaf                |
| ToBRFV/ToMMV <sup>§</sup> | Pep-288               | CREA-DC                                                        | Italy- Fondi       | <i>C. annuum</i> /'Coraza'      | 2021        | leaf                |
| ToBRFV/ToMMV <sup>§</sup> | Papir-327             | CREA-DC                                                        | Italy-Termoli      | <i>C. annuum</i> /'Cornetto'    | 2021        | leaf                |
| ToBRFV/ToMMV <sup>§</sup> | Pep-350               | CREA-DC                                                        | Italy-Foggia       | <i>C. annuum</i> /'Ricardo'     | 2021        | leaf                |
| ToBRFV/ToMMV <sup>§</sup> | Pom-25                | CREA-DC                                                        | Italy-Rome         | <i>S.lycopersicum</i> /'Roma'   | 2021        | leaf                |
| ToBRFV/ToMMV <sup>§</sup> | Pom-222               | CREA-DC                                                        | Italy- Battipaglia | <i>S.lycopersicum</i> /'Dobles' | 2021        | leaf                |
| ToBRFV/ToMMV <sup>§</sup> | Pom-241-Fo            | CREA-DC                                                        | Italy- Battipaglia | <i>S.lycopersicum</i> /'sv5197' | 2021        | leaf                |
| ToBRFV/ToMMV <sup>§</sup> | Pom-241-Fr            | CREA-DC                                                        | Italy- Battipaglia | <i>S.lycopersicum</i> /'sv5197' | 2021        | fruit               |
| ToBRFV/ToMMV <sup>§</sup> | Pom-311               | CREA-DC                                                        | Italy-Termoli      | <i>S.lycopersicum</i> /'Impact' | 2021        | leaf                |



Supplementary Table S2. RNA samples previously tested for ToBRFV, and further tested with the duplex assay developed in this study.

|    |                        |          |        |        |         |                  | Singleplex<br>(M&W) | Duplex | Duplex |                                                                                                    |
|----|------------------------|----------|--------|--------|---------|------------------|---------------------|--------|--------|----------------------------------------------------------------------------------------------------|
| ID | Plant species          | Cultivar | Matrix | Origin | Date    | ToBRFV<br>status | ToBRFV              | ToBFRV | ToMMV  | virus detected<br>by sanger<br>sequencing of<br>nested PCR<br>product of<br>Dovas et al.<br>(2004) |
| 4  | <i>C. annuum</i>       | nd       | seeds  | Italy  | 03/2021 | negative         | NA                  | NA     | NA     | nt                                                                                                 |
| 5  | <i>C. annuum</i>       | nd       | seeds  | Italy  | 03/2021 | negative         | NA                  | NA     | NA     | nt                                                                                                 |
| 6  | <i>C. annuum</i>       | nd       | seeds  | Italy  | 03/2021 | negative         | NA                  | NA     | NA     | nt                                                                                                 |
| 7  | <i>C. annuum</i>       | nd       | seeds  | Italy  | 03/2021 | negative         | NA                  | NA     | NA     | nt                                                                                                 |
| 8  | <i>C. annuum</i>       | nd       | seeds  | Italy  | 03/2021 | negative         | NA                  | NA     | NA     | nt                                                                                                 |
| 9  | <i>C. annuum</i>       | nd       | seeds  | Italy  | 03/2021 | negative         | NA                  | NA     | NA     | nt                                                                                                 |
| 10 | <i>C. annuum</i>       | nd       | seeds  | Italy  | 03/2021 | negative         | NA                  | NA     | NA     | nt                                                                                                 |
| 20 | <i>C. annuum</i>       | nd       | seeds  | Italy  | 03/2021 | negative         | NA                  | NA     | NA     | nt                                                                                                 |
| 21 | <i>C. annuum</i>       | nd       | seeds  | Italy  | 03/2021 | negative         | NA                  | NA     | NA     | nt                                                                                                 |
| 22 | <i>C. annuum</i>       | nd       | seeds  | Italy  | 03/2021 | negative         | NA                  | NA     | NA     | nt                                                                                                 |
| 23 | <i>C. annuum</i>       | nd       | seeds  | Italy  | 03/2021 | negative         | NA                  | NA     | NA     | nt                                                                                                 |
| 33 | <i>S. lycopersicum</i> | nd       | seeds  | Italy  | 05/2021 | negative         | NA                  | NA     | NA     | nt                                                                                                 |
| 34 | <i>S. lycopersicum</i> | nd       | seeds  | Italy  | 05/2021 | negative         | NA                  | NA     | NA     | nt                                                                                                 |
| 35 | <i>S. lycopersicum</i> | nd       | seeds  | Italy  | 05/2021 | negative         | NA                  | NA     | NA     | nt                                                                                                 |
| 36 | <i>S. lycopersicum</i> | nd       | seeds  | Italy  | 05/2021 | negative         | NA                  | NA     | NA     | nt                                                                                                 |
| 37 | <i>S. lycopersicum</i> | nd       | seeds  | Italy  | 05/2021 | negative         | NA                  | NA     | NA     | nt                                                                                                 |
| 38 | <i>S. lycopersicum</i> | nd       | seeds  | Italy  | 05/2021 | negative         | NA                  | NA     | NA     | nt                                                                                                 |
| 39 | <i>S. lycopersicum</i> | nd       | seeds  | Italy  | 05/2021 | negative         | NA                  | NA     | NA     | nt                                                                                                 |
| 40 | <i>S. lycopersicum</i> | nd       | seeds  | Italy  | 05/2021 | negative         | NA                  | NA     | NA     | nt                                                                                                 |
| 50 | <i>S. lycopersicum</i> | nd       | seeds  | Italy  | 05/2021 | negative         | NA                  | NA     | NA     | nt                                                                                                 |
| 51 | <i>S. lycopersicum</i> | nd       | seeds  | Italy  | 05/2021 | negative         | NA                  | NA     | NA     | nt                                                                                                 |
| 52 | <i>S. lycopersicum</i> | nd       | seeds  | Italy  | 05/2021 | negative         | NA                  | NA     | NA     | nt                                                                                                 |
| 53 | <i>S. lycopersicum</i> | nd       | seeds  | Italy  | 07/2021 | negative         | NA                  | NA     | NA     | nt                                                                                                 |
| 54 | <i>S. lycopersicum</i> | nd       | seeds  | Italy  | 07/2021 | negative         | NA                  | NA     | NA     | nt                                                                                                 |
| 55 | <i>S. lycopersicum</i> | nd       | seeds  | Italy  | 07/2021 | negative         | NA                  | NA     | NA     | nt                                                                                                 |
| 56 | <i>S. lycopersicum</i> | nd       | seeds  | Italy  | 07/2021 | negative         | NA                  | NA     | NA     | nt                                                                                                 |
| 60 | <i>C. annuum</i>       | nd       | seeds  | Italy  | 07/2021 | negative         | NA                  | NA     | NA     | nt                                                                                                 |
| 61 | <i>C. annuum</i>       | nd       | seeds  | Italy  | 07/2021 | negative         | NA                  | NA     | NA     | nt                                                                                                 |
| 62 | <i>C. annuum</i>       | nd       | seeds  | Italy  | 07/2021 | negative         | NA                  | NA     | NA     | nt                                                                                                 |
| 63 | <i>C. annuum</i>       | nd       | seeds  | Italy  | 07/2021 | negative         | NA                  | NA     | NA     | nt                                                                                                 |
| 64 | <i>S. lycopersicum</i> | nd       | seeds  | Italy  | 07/2021 | negative         | NA                  | NA     | NA     | nt                                                                                                 |
| 65 | <i>S. lycopersicum</i> | nd       | seeds  | Italy  | 07/2021 | negative         | NA                  | NA     | NA     | nt                                                                                                 |
| 66 | <i>S. lycopersicum</i> | nd       | seeds  | Italy  | 07/2021 | negative         | NA                  | NA     | NA     | nt                                                                                                 |
| 67 | <i>S. lycopersicum</i> | nd       | seeds  | Italy  | 08/2021 | negative         | NA                  | NA     | NA     | nt                                                                                                 |
| 68 | <i>C. annuum</i>       | nd       | seeds  | Italy  | 08/2021 | negative         | NA                  | NA     | NA     | nt                                                                                                 |
| 69 | <i>C. annuum</i>       | nd       | seeds  | Italy  | 08/2021 | negative         | NA                  | NA     | NA     | nt                                                                                                 |
| 72 | <i>C. annuum</i>       | nd       | seeds  | Italy  | 08/2021 | negative         | NA                  | NA     | NA     | nt                                                                                                 |
| 73 | <i>S. lycopersicum</i> | nd       | seeds  | Italy  | 08/2021 | negative         | NA                  | NA     | NA     | nt                                                                                                 |
| 74 | <i>S. lycopersicum</i> | nd       | seeds  | Italy  | 08/2021 | negative         | NA                  | NA     | NA     | nt                                                                                                 |
| 82 | <i>S. lycopersicum</i> | nd       | seeds  | Italy  | 08/2021 | negative         | NA                  | NA     | NA     | nt                                                                                                 |
| 83 | <i>S. lycopersicum</i> | nd       | seeds  | Italy  | 08/2021 | negative         | NA                  | NA     | NA     | nt                                                                                                 |
| 84 | <i>S. lycopersicum</i> | nd       | seeds  | Italy  | 08/2021 | negative         | NA                  | NA     | NA     | nt                                                                                                 |
| 90 | <i>C. annuum</i>       | nd       | seeds  | Italy  | 08/2021 | negative         | NA                  | NA     | NA     | nt                                                                                                 |

|                |                        |                        |       |          |         |          |        |        |        |                                |
|----------------|------------------------|------------------------|-------|----------|---------|----------|--------|--------|--------|--------------------------------|
| 91             | <i>C. annuum</i>       | nd                     | seeds | Italy    | 08/2021 | negative | NA     | NA     | NA     | nt                             |
| 92             | <i>C. annuum</i>       | nd                     | seeds | Italy    | 08/2021 | negative | NA     | NA     | NA     | nt                             |
| D1/21          | <i>S. lycopersicum</i> | Fuji Pink              | seeds | Brazil   | 01/2021 | negative | NA     | NA     | NA     | nt                             |
| D2/21          | <i>S. lycopersicum</i> | Sweet million          | seeds | China    | 01/2021 | negative | NA     | NA     | NA     | nt                             |
| D3/21-A,B,C    | <i>S. lycopersicum</i> | Val                    | seeds | Slovenia | 01/2021 | negative | NA*    | NA     | NA     | nt                             |
| D4/21          | <i>C. annuum</i>       | Belladonna             | seeds | India    | 01/2021 | negative | NA     | NA     | NA     | nt                             |
| D28/21         | <i>S. lycopersicum</i> | Dyno F1                | seeds | Thailand | 02/2021 | negative | NA     | NA     | NA     | nt                             |
| D41/21         | <i>S. lycopersicum</i> | Runner F1              | seeds | nd       | 03/2021 | negative | NA     | NA*    | NA     | nt                             |
| D43/21-A,B,C   | <i>S. lycopersicum</i> | Begunec                | seeds | Slovenia | 03/2021 | negative | NA*    | NA*    | NA     | nt                             |
| D76/21-A,B,C   | <i>C. annuum</i>       | Alpina                 | seeds | Serbia   | 03/2021 | negative | NA     | NA     | NA     | nt                             |
| D191/21-A,B,C  | <i>S. lycopersicum</i> | Sweetheart             | seeds | China    | 04/2021 | negative | NA     | NA     | NA     | nt                             |
| D194/21-A,B,C  | <i>C. annuum</i>       | Karola                 | seeds | China    | 04/2021 | negative | 38.2** | NA     | NA     | nt                             |
| D195/21-A,B,C  | <i>C. annuum</i>       | Stef                   | seeds | China    | 04/2021 | negative | NA*    | NA     | NA     | nt                             |
| D196/21-A,B,C  | <i>C. annuum</i>       | Dumbo                  | seeds | China    | 04/2021 | negative | NA     | NA     | NA     | nt                             |
| D198/21-A,B,C  | <i>C. annuum</i>       | Dracula                | seeds | China    | 04/2021 | negative | 35.8   | NA*    | NA     | nt                             |
| D261/21-A,B,C  | <i>S. lycopersicum</i> | Coure di bue           | seeds | China    | 04/2021 | negative | NA     | NA     | NA*    | nt                             |
| D262/21-A,B    | <i>C. annuum</i>       | Cayenna                | seeds | China    | 04/2021 | negative | NA     | NA     | NA     | nt                             |
| D263/21-A,B,C  | <i>S. lycopersicum</i> | Pantano                | seeds | China    | 04/2021 | negative | NA     | NA*    | NA*    | nt                             |
| D264/21-A,B,C  | <i>C. annuum</i>       | Corno giallo           | seeds | China    | 04/2021 | negative | NA     | NA     | NA*    | nt                             |
| D278/21-A,B,C  | <i>S. lycopersicum</i> | Marmande               | seeds | China    | 04/2021 | negative | 37.1** | 36.4** | NA     | nt                             |
| D279/21-A,B    | <i>C. annuum</i>       | Quadrato d'Asti giallo | seeds | China    | 04/2021 | negative | NA     | NA*    | NA     | nt                             |
| D280/21-A,B    | <i>C. annuum</i>       | Soroksari              | seeds | China    | 04/2021 | negative | NA     | NA     | NA     | nt                             |
| D281/21-A,B,C  | <i>S. lycopersicum</i> | Red cherry             | seeds | China    | 04/2021 | negative | NA     | NA     | NA*    | nt                             |
| D308/21-A,B,C  | <i>S. lycopersicum</i> | Ghittia                | seeds | China    | 05/2021 | negative | NA     | NA     | NA*    | nt                             |
| D311/21-A,B,C  | <i>S. lycopersicum</i> | Lillagro               | seeds | China    | 05/2021 | negative | NA     | NA     | NA*    | nt                             |
| D313/21-A,B,C  | <i>S. lycopersicum</i> | Corina                 | seeds | China    | 05/2021 | negative | 38.3** | 38.7** | NA     | nt                             |
| D316/21-A,B,C  | <i>S. lycopersicum</i> | Henriet                | seeds | China    | 05/2021 | negative | NA*    | NA*    | NA*    | nt                             |
| D317/21-A,B,C  | <i>C. annuum</i>       | Andreika               | seeds | China    | 05/2021 | negative | NA     | NA     | NA*    | nt                             |
| D318/21-A,B,C  | <i>C. annuum</i>       | Barbara                | seeds | China    | 05/2021 | negative | NA     | NA     | NA     | nt                             |
| D319/21-A,B,C  | <i>C. annuum</i>       | Splendid               | seeds | China    | 05/2021 | negative | NA*    | NA     | NA     | nt                             |
| D320/21-A,B,C  | <i>C. annuum</i>       | Vlad                   | seeds | China    | 05/2021 | negative | NA*    | NA     | NA     | nt                             |
| D321/21-A,B,C  | <i>C. annuum</i>       | Mircea                 | seeds | China    | 05/2021 | negative | NA     | NA     | NA     | nt                             |
| D322/21-A,B,C  | <i>C. annuum</i>       | California Wonder      | seeds | China    | 05/2021 | negative | NA     | NA*    | NA*    | nt                             |
| D325/21-A,B,C  | <i>S. lycopersicum</i> | Raluca                 | seeds | China    | 05/2021 | negative | NA*    | NA*    | NA*    | nt                             |
| D327/21-A,B,C  | <i>S. lycopersicum</i> | Lillagro               | seeds | China    | 05/2021 | negative | 37.7** | NA*    | NA*    | nt                             |
| D329/21-A,B,C  | <i>C. annuum</i>       | Karola                 | seeds | China    | 05/2021 | negative | 34.8   | NA*    | NA     | nt                             |
| D335/21-A,B,C  | <i>C. annuum</i>       | Vlad                   | seeds | China    | 05/2021 | negative | 36     | NA     | NA     | nt                             |
| D979/21-A,B,C  | <i>S. lycopersicum</i> | Factor F1              | seeds | nd       | 08/2021 | negative | NA*    | NA     | NA     | nt                             |
| D1364/21       | <i>S. lycopersicum</i> | Toivo F1               | seeds | nd       | 10/2021 | negative | NA     | NA     | NA     | nt                             |
| D1388/21       | <i>S. lycopersicum</i> | Vitellio               | seeds | nd       | 10/2021 | negative | NA     | NA     | NA     | nt                             |
| D1365/21-A,B,C | <i>S. lycopersicum</i> | Tonatico               | seeds | nd       | 10/2021 | negative | NA*    | NA     | 37.7** | no nested PCR product obtained |
| D324/21-A,B,C  | <i>S. lycopersicum</i> | Elisabeta              | seeds | China    | 05/2021 | negative | NA*    | NA*    | 37.0** | ToMV confirmed                 |
| D201/21-A,B,C  | <i>S. lycopersicum</i> | Ghittia                | seeds | China    | 04/2021 | negative | NA*    | NA*    | 36.8   | no nested PCR product obtained |
| D310/21-A,B,C  | <i>S. lycopersicum</i> | Ideal                  | seeds | China    | 05/2021 | negative | NA*    | NA*    | 36.6** | ToMV confirmed                 |

|               |                        |                 |       |       |         |          |        |        |        |                                                      |
|---------------|------------------------|-----------------|-------|-------|---------|----------|--------|--------|--------|------------------------------------------------------|
| D202/21-A,B,C | <i>S. lycopersicum</i> | Drops           | seeds | China | 04/2021 | negative | NA*    | NA*    | 36.2** | ToMV suspected                                       |
| D309/21-A,B,C | <i>S. lycopersicum</i> | Unibac          | seeds | China | 05/2021 | negative | NA     | NA     | 36.0** | ToMV confirmed                                       |
| D323/21-A,B,C | <i>S. lycopersicum</i> | Amalia          | seeds | China | 05/2021 | negative | NA*    | NA*    | 35.8   | TMGMV suspected                                      |
| D333/21-A,B,C | <i>S. lycopersicum</i> | Elisabeta       | seeds | China | 05/2021 | negative | NA     | NA*    | 35.6   | mix infection with different tobamoviruses suspected |
| D326/21-A,B,C | <i>S. lycopersicum</i> | Buzau           | seeds | China | 05/2021 | negative | 37.3** | 37.9** | 31.7   | mix infection with different tobamoviruses suspected |
| D200/21-A,B,C | <i>S. lycopersicum</i> | Raluca          | seeds | China | 04/2021 | negative | 36.9   | 35.2   | 29.7   | mix infection with ToMMV and ToMV suspected          |
| D328/21-A,B,C | <i>S. lycopersicum</i> | Chiquita pot    | seeds | China | 05/2021 | negative | 37.8   | 36.6** | 29     | ToMMV confirmed                                      |
| D334/21-A,B,C | <i>S. lycopersicum</i> | Ruxandra        | seeds | China | 05/2021 | negative | 38.5** | NA     | 27.7   | ToMMV confirmed                                      |
| D314/21-A,B,C | <i>S. lycopersicum</i> | Sandybelle      | seeds | China | 05/2021 | negative | NA*    | NA*    | 27.6   | ToMMV confirmed                                      |
| D315/21-A,B,C | <i>S. lycopersicum</i> | Imola           | seeds | China | 05/2021 | negative | NA*    | NA*    | 26.2   | ToMMV confirmed                                      |
| D332/21-A,B,C | <i>S. lycopersicum</i> | Amalia          | seeds | China | 05/2021 | negative | 36.4** | 36.0** | 23.1   | ToMMV confirmed                                      |
| D192/21-A,B,C | <i>S. lycopersicum</i> | Silvia          | seeds | China | 04/2021 | positive | 31.3   | 31.9   | NA     | nt                                                   |
| D193/21-3     | <i>S. lycopersicum</i> | Drops           | seeds | China | 04/2021 | positive | 32.6   | 31.6   | NA     | nt                                                   |
| D197/21-A,B,C | <i>C. annuum</i>       | Barbara         | seeds | China | 04/2021 | positive | 29.2   | 29     | NA     | nt                                                   |
| D199/21-A,B,C | <i>C. annuum</i>       | Pintea          | seeds | China | 04/2021 | positive | 17.2   | 16.1   | NA     | nt                                                   |
| D312/21-1     | <i>S. lycopersicum</i> | Chiquita pot    | seeds | China | 05/2021 | positive | 32.1   | 31.7   | NA     | nt                                                   |
| D330/21-A,B,C | <i>C. annuum</i>       | Galben superior | seeds | China | 05/2021 | positive | 32.7   | 33.8   | NA     | nt                                                   |
| D330/21-2,4   | <i>C. annuum</i>       | Galben superior | seeds | China | 05/2021 | positive | 31.7   | 32.5   | NA*    | nt                                                   |
| D331/21-4     | <i>C. annuum</i>       | Stef            | seeds | China | 05/2021 | positive | 31.9   | 33     | NA*    | nt                                                   |

Each sample was divided into three subsamples, each of which was tested in 2-3 technical repetitions. The average Cq values of all parallels are indicated or marked as NA if no exponential amplification curves were observed.

ToBRFV status was determined based on results of both real-time RT-PCRs recommended in EPPO standard PM7/146(1)

nd - not determined; nt - not tested; \*one up to half parallels with Cq between 34 and 40; \*\*one up to half parallels with no exponential amplification curve

Supplementary Table S3. List of all the ToMMV isolates included in the in-silico analysis

| Isolate                        | Host                  | Origin         | Sequencing methodology | Date of collection | Reference                                    |
|--------------------------------|-----------------------|----------------|------------------------|--------------------|----------------------------------------------|
| MN654021_ToMMV_19_02305        | <i>C. annuum</i>      | NL             | Sanger HTS Illumina    | 2020               | Australas. Plant Dis. Notes 15 (1), 8 (2020) |
| MH128145_ToMMV_CpB1            | <i>S.lycopersicum</i> | BR             | Illumina               | 1992               | Nagai,A. et al., 2018                        |
| MG171192_MP_ToMMV_Hainan       | <i>S.lycopersicum</i> | CN             | Sanger                 | 2016               | Zhan,B. et al., 2017                         |
| KX898034_ToMMV_CA16_01         | <i>S.lycopersicum</i> | USA            | Sanger Illumina        | 2016               | Sui,X. Et al., 2017                          |
| KX898033_ToMMV_SC13_05         | <i>S.lycopersicum</i> | USA            | Sanger Illumina        | 2013               | Sui,X. Et al., 2018                          |
| KR824951_ToMMV_TiLhaLJ         | <i>C. frutescens</i>  | Tibet          | nd                     | 2013               | Li et al., 2016                              |
| KR824950_ToMMV_YYMLJ           | <i>C. annuum</i>      | CN Yunnan      | nd                     | 2013               | Li et al., 2017                              |
| KT810183_ToMMV_NY_13           | <i>S.lycopersicum</i> | USA-NY         | Illumina               | 2013               | Padmanabhan,C. et al., 2015                  |
| KP202857_ToMMV_10_100          | <i>S.lycopersicum</i> | USA-FL         | Sanger IonTorrent      | 2010               | Fillmer,K et al., 2015                       |
| MW582804_ToMMV<br>DSMZ_PV_1267 | <i>S.lycopersicum</i> | USA-california | Illumina               | nd                 | Knierim,D et al., 2021                       |
| MN853592_ToMMV_LN              | <i>S.lycopersicum</i> | CN Liaoning    | Sanger                 | 2015               | Tu and Ji 2019                               |
| MH381817_ToMMV_HN              | <i>S.lycopersicum</i> | CN             | nd                     | nd                 | Liu e Zhou 2018                              |
| NC_022230_MP_ToMMV_MX5         | <i>S.lycopersicum</i> | MX             | sanger Illumina        | 2009               | Li et al., 2013                              |
| KU594507_ToMMV_SP              | <i>S.lycopersicum</i> | SP             | Sanger                 | 2015               | Ambros,S et al., 2017                        |

nd-not determined
